# Supplementary material for: Escherichia coli O157:H7 strains harbor at least three distinct sequence types of Shiga toxin 2a-converting phages
Source: PubMed Central journal article supplement (PMC4587872; doi:10.1186/s12864-015-1934-1), 2015-09-29
Supplement: 12864_2015_1934_MOESM1_ESM.pdf [file 12864_2015_1934_MOESM1_ESM.pdf]

**Table S1.** PA strain information

| <b>Strain Name<sup>a</sup></b> | <b>Clade<sup>b</sup></b> | <b>stx Allele(s)</b>            | <b>Genome accession<sup>d</sup></b> | <b>Phage accession<sup>e</sup></b> |
|--------------------------------|--------------------------|---------------------------------|-------------------------------------|------------------------------------|
| PA2                            | 8                        | <i>stx2a</i>                    | AOEL00000000                        | KP682371                           |
| PA3                            | 8                        | <i>stx2a, stx2c</i>             | AKLC01000000                        |                                    |
| PA4                            | 2.9                      | <i>stx1a, stx2a</i>             | AMUA01000000                        | KP682372                           |
| PA5                            | 2.9                      | <i>stx1a, stx2a</i>             | AKLD01000000                        | KP682373                           |
| PA7                            | 2.9                      |                                 | AMTQ00000000                        |                                    |
| PA8                            | 8                        | <i>stx2a</i>                    | AOEO00000000                        | KP682374                           |
| PA9                            | 8                        | <i>stx2a</i>                    | AKLE01000000                        |                                    |
| PA10                           | 6                        | <i>stx2c</i>                    | AKLF01000000                        |                                    |
| PA11                           | 2.9                      | <i>stx2a</i>                    | AOEI00000000                        | KP682375                           |
| PA12                           | 2.9                      | <i>stx1a, stx2a</i>             | <i>This study</i>                   | KP682376                           |
| PA13                           | 8                        | <i>stx2a, stx2c</i>             | AOEK00000000                        |                                    |
| PA14                           | 2.9                      | <i>stx1a, stx2a</i>             | AKLG01000000                        |                                    |
| PA15                           | 2.9                      | <i>stx1a, stx2a</i>             | AKLH01000000                        |                                    |
| PA16                           | 2.9                      | <i>stx1a, stx2a</i>             | <i>This study</i>                   | KP682377                           |
| PA17                           | 2.9                      | <i>stx1a, stx2a</i>             | <i>This study</i>                   |                                    |
| PA18                           | *                        | <i>stx1a, stx2a</i>             | <i>This study</i>                   | KP682378                           |
| PA19                           | 8                        | <i>stx2a</i>                    | AOEJ00000000                        |                                    |
| PA21                           | *                        | <i>stx1a, stx2a</i>             | <i>This study</i>                   | KP682379                           |
| PA22                           | 5.2                      | <i>stx1a, stx2c</i>             | AKLI00000000                        |                                    |
| PA23                           | 2.9                      | <i>stx1a, stx2a</i>             | AMUB01000000                        |                                    |
| PA24                           | 8                        | <i>stx1a</i>                    | AKLJ01000000                        |                                    |
| PA25                           | 8                        | <i>stx2a</i>                    | AKLK01000000                        |                                    |
| PA27                           | 2.9                      | <i>stx1a, stx2a</i>             | <i>This study</i>                   | KP682380                           |
| PA28                           | 8                        | <i>stx2a, stx2c</i>             | AKLL01000000                        | KP682381                           |
| PA29                           | 2.9                      | <i>stx1a, stx2a</i>             | <i>This study</i>                   | KP682382                           |
| PA30                           | *                        | <i>stx1a, stx2a</i>             | <i>This study</i>                   | KP682383                           |
| PA31                           | 2.9                      | <i>stx1a, stx2a</i>             | AKLM01000000                        |                                    |
| PA32                           | 2.9                      | <i>stx2a</i>                    | AKLN01000000                        | KP682384                           |
| PA33                           | 2.9                      | <i>stx1a, stx2a<sup>c</sup></i> | AKLO01000000                        | KP682385                           |
| PA34                           | 8                        | <i>stx2a</i>                    | AMTR01000000                        |                                    |
| PA35                           | 8                        | <i>stx2a, stx2c</i>             | AOES00000000                        |                                    |
| PA36                           | 2.9                      | <i>stx1a, stx2a</i>             | <i>This study</i>                   | KP682386                           |
| PA38                           | 6                        | <i>stx2c</i>                    | AMUO01000000                        |                                    |
| PA39                           | 8                        | <i>stx2a, stx2c</i>             | AKLP01000000                        |                                    |
| PA40                           | 7                        | <i>stx2c</i>                    | AKLQ00000000                        |                                    |
| PA41                           | 7                        | <i>stx1a, stx2c</i>             | AKLR01000000                        |                                    |
| PA42                           | 2.4                      | <i>stx1a, stx2a</i>             | AKLS01000000                        | KP682387                           |
| PA44                           | 2.9                      | <i>stx1a, stx2a</i>             | <i>This study</i>                   | KP682388                           |
| PA45                           | 2.4                      | <i>stx1a, stx2a</i>             | AMUD01000000                        | KP682389                           |
| PA47                           | 8                        | <i>stx2a, stx2c</i>             | AOEM00000000                        |                                    |
| PA48                           | 9                        | <i>stx1a, stx2c</i>             | AOEN01000100                        |                                    |
| PA49                           | 2.9                      | <i>stx1a, stx2a</i>             | AMUC01000000                        |                                    |
| PA50                           | *                        | <i>stx1a, stx2a</i>             | <i>This study</i>                   | KP682390                           |

|      |   |                     |                   |          |
|------|---|---------------------|-------------------|----------|
| PA51 | * | <i>stx1a, stx2a</i> | <i>This study</i> | KP682391 |
| PA52 | * | <i>stx1a, stx2a</i> | <i>This study</i> | KP682392 |

<sup>a</sup> For all 45 isolates, the date and geographic location of isolation, PFGE pattern and LSPA type were previously reported by Hartzell *et al.* (2011).

<sup>b</sup> Clade types were determined *in silico* or reported previously (Hartzell *et al.*, 2011). \* Unable to assign a clade because of missing SNP positions due to sequence quality.

<sup>c</sup> Strain PA33 was previously reported as an “*stx2* variant” (Hartzell *et al.* 2011). However, the phage genome sequence reported here identified it as *stx2a*.

<sup>d</sup> For isolates previously sequenced, GenBank accession numbers are reported. The 13 isolates sequenced during this study were submitted to the Short Read Archive under Bioproject PRJNA274145.

<sup>e</sup> GenBank accession numbers for phage sequenced in this study.
