# Supplementary material for: Escherichia coli O157:H7 strains harbor at least three distinct sequence types of Shiga toxin 2a-converting phages
Source: PubMed Central journal article supplement (PMC4587872; doi:10.1186/s12864-015-1934-1), 2015-09-29

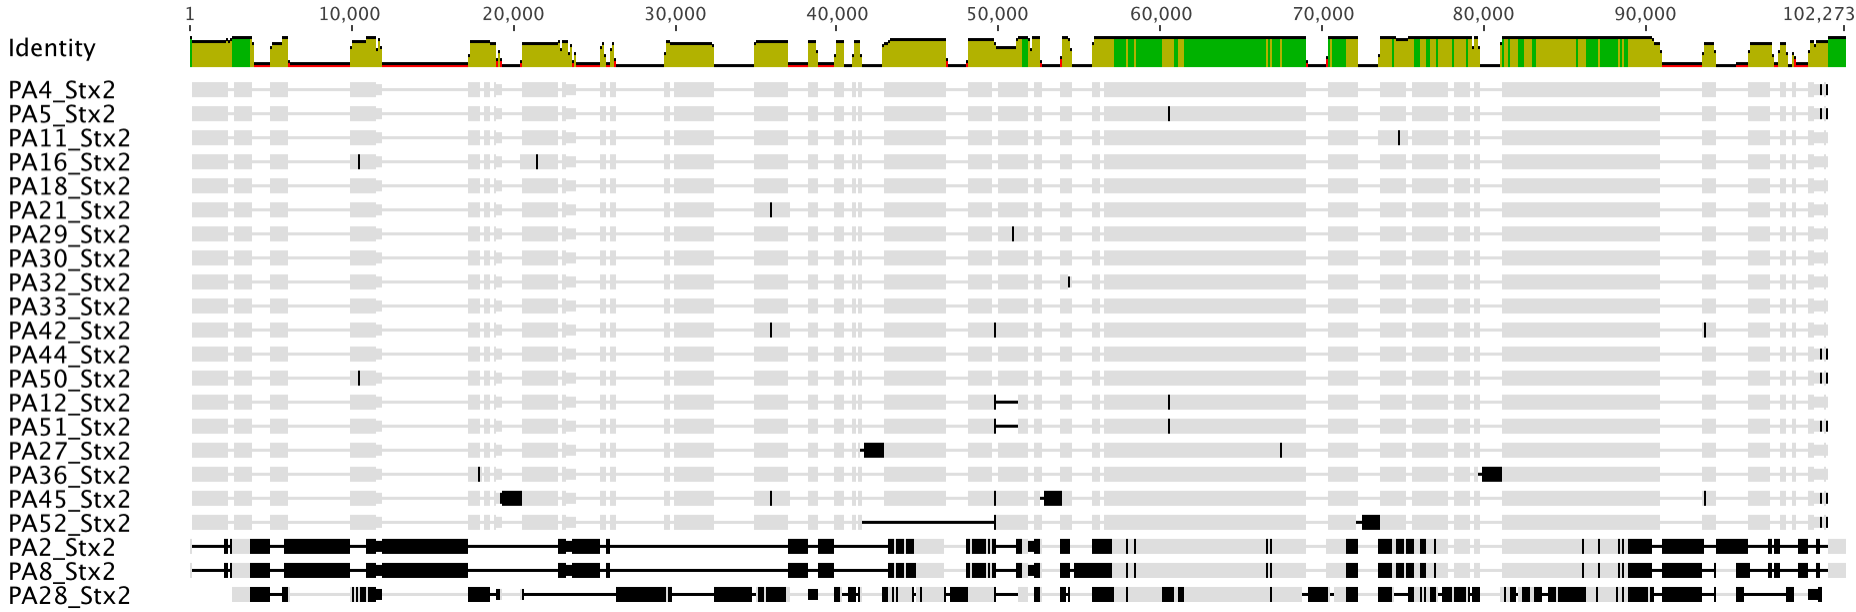

Supplement: 12864_2015_1934_MOESM2_ESM.pdf [file 12864_2015_1934_MOESM2_ESM.pdf]
