# Supplementary material for: Escherichia coli O157:H7 strains harbor at least three distinct sequence types of Shiga toxin 2a-converting phages
Source: PubMed Central journal article supplement (PMC4587872; doi:10.1186/s12864-015-1934-1), 2015-09-29
Supplement: 12864_2015_1934_MOESM3_ESM.pdf [file 12864_2015_1934_MOESM3_ESM.pdf]

**Table S2.** SNPs observed comparing phage within the PST1-1 cluster

| Position on phage genome | Host Strain | SNPs using PA4 as reference | Predicted function                 | Amino acid change |
|--------------------------|-------------|-----------------------------|------------------------------------|-------------------|
| 5453                     | PA50, PA16  | G-A                         | intergenetic                       | -                 |
| 9377                     | PA16        | T-G                         | Predicted operator O <sub>R2</sub> | -                 |
| 16107                    | PA42, PA21  | A-G                         | hypothetical                       | K-R               |
| 24363                    | PA42        | G-T                         | hypothetical                       | synonymous        |
| 25476                    | PA29        | G-A                         | IS629                              | P-S               |
| 27482                    | PA32        | A-G                         | intergenetic                       | -                 |
| 32341                    | PA5         | C-T                         | portal protein                     | R-W               |
| 43963                    | PA11        | C-T                         | tail fiber                         | T-I               |
| 58904                    | PA42        | A-C                         | hypothetical                       | synonymous        |
