# Supplementary material for: Escherichia coli O157:H7 strains harbor at least three distinct sequence types of Shiga toxin 2a-converting phages
Source: PubMed Central journal article supplement (PMC4587872; doi:10.1186/s12864-015-1934-1), 2015-09-29
Supplement: 12864_2015_1934_MOESM4_ESM.pdf [file 12864_2015_1934_MOESM4_ESM.pdf]

**Table S3.** IS629 insertion site

| <b>PST Type</b> | <b>Copy of IS629</b> | <b>Gene Disrupted</b>                                                 |
|-----------------|----------------------|-----------------------------------------------------------------------|
| PST1-1          | 1                    | phage protein                                                         |
| PST1-3          | 2                    | putative DNA-binding protein Roi<br>same as PST1-1                    |
| PST1-4          | 2                    | same as PST1-1<br>hypothetical protein                                |
| PST1-5          | 3                    | inter-genetic region<br>same as PST1-1                                |
| PST1-6          | 3                    | phage lysozyme,<br>putative DNA-binding protein Roi<br>same as PST1-1 |
| PST2-1          | 1                    | hypothetical protein<br>adenine DNA methyltransferase                 |
| PST2-2          | 1                    | inter-genetic region                                                  |
