# Supplementary material for: Escherichia coli O157:H7 strains harbor at least three distinct sequence types of Shiga toxin 2a-converting phages
Source: PubMed Central journal article supplement (PMC4587872; doi:10.1186/s12864-015-1934-1), 2015-09-29
Supplement: 12864_2015_1934_MOESM5_ESM.pdf [file 12864_2015_1934_MOESM5_ESM.pdf]

**Table S4.** Sequence identity of selected genes from the 3 PST clusters

| <i>cIII</i> (DNA) | PST1 | PST3  |
|-------------------|------|-------|
| PST1              | -    | 98.18 |
| PST3              | -    | -     |

  

| <i>cIII</i> (Amino Acid) | PST1 | PST3  |
|--------------------------|------|-------|
| PST1                     | -    | 98.15 |
| PST3                     | -    | -     |

  

| <i>N</i> (DNA) | PST1 | PST3  |
|----------------|------|-------|
| PST1           | -    | 50.58 |
| PST3           | -    | -     |

  

| <i>N</i> (Amino Acid) | PST1 | PST3  |
|-----------------------|------|-------|
| PST1                  | -    | 19.32 |
| PST3                  | -    | -     |

  

| <i>cI</i> (DNA) | PST1 | PST2  | PST3  |
|-----------------|------|-------|-------|
| PST1            | -    | 62.81 | 48.72 |
| PST2            | -    | -     | 48.57 |
| PST3            | -    | -     | -     |

  

| <i>cI</i> (Amino Acid) | PST1 | PST2  | PST3  |
|------------------------|------|-------|-------|
| PST1                   | -    | 49.77 | 14.08 |
| PST2                   | -    | -     | 17.59 |
| PST3                   | -    | -     | -     |

  

| <i>cro</i> (DNA) | PST1 | PST2  | PST3  |
|------------------|------|-------|-------|
| PST1             | -    | 48.85 | 46.70 |
| PST2             | -    | -     | 56.70 |
| PST3             | -    | -     | -     |

  

| <i>cro</i> (Amino Acid) | PST1 | PST2 | PST3  |
|-------------------------|------|------|-------|
| PST1                    | -    | 9.84 | 18.18 |
| PST2                    | -    | -    | 17.74 |
| PST3                    | -    | -    | -     |

  

| <i>cII</i> (DNA) | PST1 | PST3  |
|------------------|------|-------|
| PST1             | -    | 97.31 |
| PST3             | -    | -     |

| <i>cII</i> (Amino Acid) | PST1 | PST3  |        |
|-------------------------|------|-------|--------|
| PST1                    | -    | 94.9  |        |
| PST3                    | -    | -     |        |
| <i>O</i> (DNA)          | PST1 | PST2  | PST3   |
| PST1                    | -    | 50.92 | 57.03  |
| PST2                    | -    | -     | 61.98  |
| PST3                    | -    | -     | -      |
| <i>O</i> (Amino Acid)   | PST1 | PST2  | PST3   |
| PST1                    | -    | 12.71 | 8.81   |
| PST2                    | -    | -     | 16.03  |
| PST3                    | -    | -     | -      |
| <i>P</i> (DNA)          | PST1 | PST2  | PST3   |
| PST1                    | -    | 49.94 | 70.33  |
| PST2                    | -    | -     | 56.74  |
| PST3                    | -    | -     | -      |
| <i>P</i> (Amino Acid)   | PST1 | PST2  | PST3   |
| PST1                    | -    | 7.12  | 11.59  |
| PST2                    | -    | -     | 13.36  |
| PST3                    | -    | -     | -      |
| <i>Q</i> (DNA)          | PST1 | PST2  | PST3   |
| PST1                    | -    | 97.70 | 100.00 |
| PST2                    | -    | -     | 97.70  |
| PST3                    | -    | -     | -      |
| <i>Q</i> (Amino Acid)   | PST1 | PST2  | PST3   |
| PST1                    | -    | 98.61 | 100.00 |
| PST2                    | -    | -     | 98.61  |
| PST3                    | -    | -     | -      |
| Lysozyme (DNA)          | PST1 | PST2  | PST3   |
| PST1                    | -    | 91.57 | 93.26  |
| PST2                    | -    | -     | 92.32  |
| PST3                    | -    | -     | -      |
| Lysozyme (Amino Acid)   | PST1 | PST2  | PST3   |

|             |   |       |       |
|-------------|---|-------|-------|
| <b>PST1</b> | - | 97.74 | 96.05 |
| <b>PST2</b> | - | -     | 94.92 |
| <b>PST3</b> | - | -     | -     |

| <b>Tail fiber (DNA)</b> | <b>PST1</b> | <b>PST2</b> | <b>PST3</b> |
|-------------------------|-------------|-------------|-------------|
| <b>PST1</b>             | -           | 100.00      | 100.00      |
| <b>PST2</b>             | -           | -           | 100.00      |
| <b>PST3</b>             | -           | -           | -           |

| <b>Tail fiber (Amino Acid)</b> | <b>PST1</b> | <b>PST2</b> | <b>PST3</b> |
|--------------------------------|-------------|-------------|-------------|
| <b>PST1</b>                    | -           | 100.00      | 100.00      |
| <b>PST2</b>                    | -           | -           | 100.00      |
| <b>PST3</b>                    | -           | -           | -           |
