# Supplementary material for: Escherichia coli O157:H7 strains harbor at least three distinct sequence types of Shiga toxin 2a-converting phages
Source: PubMed Central journal article supplement (PMC4587872; doi:10.1186/s12864-015-1934-1), 2015-09-29
Supplement: 12864_2015_1934_MOESM6_ESM.pdf [file 12864_2015_1934_MOESM6_ESM.pdf]

**Table S5.** Putative operator sequence of PST1 and PST3

|                       | <b>PST1<sup>a</sup></b> | <b>PST3</b>    |
|-----------------------|-------------------------|----------------|
| <b>O<sub>R1</sub></b> | TACAACGCTTTGTATTT       | ATAAATGACTGAT  |
| <b>O<sub>R2</sub></b> | CAATACAATTTGTTCTA       | ATAACTATATTTAT |
| <b>O<sub>R3</sub></b> | TAGTACGATATGTACTT       | ATAACCTAAGTTAT |
| <b>O<sub>L1</sub></b> | TATTACGCTCTGTACTG       | ATAACCACGGTTAT |
| <b>O<sub>L2</sub></b> | ATGCACAATGTGTATTT       | ACAACAATTGTTAT |
| <b>O<sub>L3</sub></b> | AAGTACATATTGTATTT       | ATAACTCATGTTAT |

<sup>a</sup> same as operator sequences in *E. coli* O157:H7 Sakai [37]
