# Supplementary material for: Escherichia coli O157:H7 strains harbor at least three distinct sequence types of Shiga toxin 2a-converting phages
Source: PubMed Central journal article supplement (PMC4587872; doi:10.1186/s12864-015-1934-1), 2015-09-29
Supplement: 12864_2015_1934_MOESM7_ESM.pdf [file 12864_2015_1934_MOESM7_ESM.pdf]

**Table S6.** GenBank information for *stx2*-converting phage

| <b>Host Strain or Phage Name<sup>a</sup></b> | <b>Accession number</b> | <b>Insertion site<sup>a</sup></b> | <b>Genomic region</b> | <b>Reference</b> |
|----------------------------------------------|-------------------------|-----------------------------------|-----------------------|------------------|
| Sakai                                        | BA000007                | <i>wrbA</i>                       | 1246012-1308719       | [30]             |
| EDL933                                       | AE005174.2              | <i>wrbA</i>                       | 1330829-1392498       | [58]             |
| Xuzhou21                                     | CP001925.1              | <i>wrbA</i>                       | 1247053-1310658       | [89]             |
| O103:H2 12009                                | AP010958.1              | tRNA( <i>argW</i> )               | 2861734-2924345       | [42]             |
| O111:H- 11128                                | AP010960.1              | <i>yecE</i>                       | 2392300-2440434       | [42]             |
| EC4115                                       | CP001164.1              | tRNA( <i>argW</i> )               | 3234765-3297047       | [53]             |
| TW14359                                      | CP001368.1              | tRNA( <i>argW</i> )               | 3189636-3251918       | [90]             |
| O104:H4 2011C-3493                           | CP003289.1              | <i>wrbA</i>                       | 3248372-3317120       | [41]             |
| O104:H4 2009EL-2071                          | CP003301.1              | <i>wrbA</i>                       | 3298273-3366761       | [41]             |
| O104:H4 2009EL-2050                          | CP003297.1              | <i>wrbA</i>                       | 3240628-3309116       | [41]             |
| Stx2-86                                      | AB255436                | -                                 | -                     | -                |
| Stx2 phi I                                   | AP004402                | -                                 | -                     | [91]             |
| Stx2 phi II                                  | AP005154                | -                                 | -                     | [92]             |
| Min27                                        | EU311208                | -                                 | -                     | [93]             |
| TL-2011C                                     | JQ011318                | -                                 | -                     | [43]             |
| vB_EcoP_24B                                  | HM208303                | -                                 | -                     | [20]             |
| VT2Phi                                       | HQ424691.1              | -                                 | -                     | [40]             |

<sup>a</sup> Insertion sites are only reported when phages were sequenced as part of a full genome project
