# Supplementary material for: Escherichia coli O157:H7 strains harbor at least three distinct sequence types of Shiga toxin 2a-converting phages
Source: PubMed Central journal article supplement (PMC4587872; doi:10.1186/s12864-015-1934-1), 2015-09-29
Supplement: 12864_2015_1934_MOESM8_ESM.pdf [file 12864_2015_1934_MOESM8_ESM.pdf]

**Table S7.** Sequence percent identity of regulatory genes and proteins, comparing each PST to the closest related previously sequenced phage.

|                                 |        |
|---------------------------------|--------|
| <b><i>cIII</i> (DNA)</b>        |        |
| PST1 and EDL933                 | 98.79  |
| PST3 and EC4115                 | 97.58  |
| <b><i>cIII</i> (Amino Acid)</b> |        |
| PST1 and EDL933                 | 98.15  |
| PST3 and EC4115                 | 98.15  |
| <b><i>N</i> (DNA)</b>           |        |
| PST1 and EDL933                 | 71.43  |
| PST3 and EC4115                 | 47.92  |
| <b><i>N</i> (Amino Acid)</b>    |        |
| PST1 and EDL933                 | 58.89  |
| PST3 and EC4115                 | 17.76  |
| <b><i>cI</i> (DNA)</b>          |        |
| PST1 and EDL933                 | 49.56  |
| PST2 and O104:H4 2011C-3493     | 100.00 |
| PST3 and EC4115                 | 59.59  |
| <b><i>cI</i> (Amino Acid)</b>   |        |
| PST1 and EDL933                 | 18.75  |
| PST2 and O104:H4 2011C-3493     | 100.00 |
| PST3 and EC4115                 | 14.62  |
| <b><i>cro</i> (DNA)</b>         |        |
| PST1 and EDL933                 | 18.84  |
| PST2 and O104:H4 2011C-3493     | 100.00 |
| PST3 and EC4115                 | 26.47  |
| <b><i>cro</i> (Amino Acid)</b>  |        |
| PST1 and EDL933                 | 18.75  |
| PST2 and O104:H4 2011C-3493     | 100.00 |
| PST3 and EC4115                 | 14.62  |
| <b><i>cII</i> (DNA)</b>         |        |
| PST1 and EDL933                 | 95.96  |

PST3 and EC4115 | 88.55

***cII* (Amino Acid)**

---

|                 |       |
|-----------------|-------|
| PST1 and EDL933 | 95.92 |
| PST3 and EC4115 | 86.73 |

***O* (DNA)**

---

|                             |       |
|-----------------------------|-------|
| PST1 and EDL933             | 57.03 |
| PST2 and O104:H4 2011C-3493 | 95.73 |
| PST3 and EC4115             | 98.62 |

***O* (Amino Acid)**

---

|                             |       |
|-----------------------------|-------|
| PST1 and EDL933             | 8.81  |
| PST2 and O104:H4 2011C-3493 | 98.22 |
| PST3 and EC4115             | 99.68 |

***P* (DNA)**

---

|                             |       |
|-----------------------------|-------|
| PST1 and EDL933             | 70.76 |
| PST2 and O104:H4 2011C-3493 | 97.22 |
| PST3 and EC4115             | 96.72 |

***P* (Amino Acid)**

---

|                             |       |
|-----------------------------|-------|
| PST1 and EDL933             | 10.73 |
| PST2 and O104:H4 2011C-3493 | 96.90 |
| PST3 and EC4115             | 97.85 |

***Q* (DNA)**

---

|                             |        |
|-----------------------------|--------|
| PST1 and EDL933             | 100.00 |
| PST2 and O104:H4 2011C-3493 | 95.63  |
| PST3 and EC4115             | 100.00 |

***Q* (Amino Acid)**

---

|                             |        |
|-----------------------------|--------|
| PST1 and EDL933             | 100.00 |
| PST2 and O104:H4 2011C-3493 | 95.83  |
| PST3 and EC4115             | 100.00 |
